# Supplementary material for: CdS nanoparticle decorated triazine-based COFs with enhanced photocatalytic activity for highly effective degradation of emerging contaminants
Source: Royal Society of Chemistry journal article supplement (doi:10.1039/d1nj04229g), 2021-01-01
Supplement: d1nj04229g1.pdf [file d1nj04229g1.pdf]

## Supplementary Material

### **CdS nanoparticles decorated triazine-based COFs with enhanced photocatalytic activity for highly effective degradation of emerging contaminants**

Yanqing Cong, Xiang Chen, Wanxing Wang, Shi-Wen Lv\*

School of Environmental Science and Engineering, Zhejiang Gongshang University,  
Hangzhou 310018, China

---

\*Corresponding author.

Mail to: No.18 Xuezheng Road, Hangzhou, 310018, China.

Email: lvshiwen@zjgsu.edu.cn

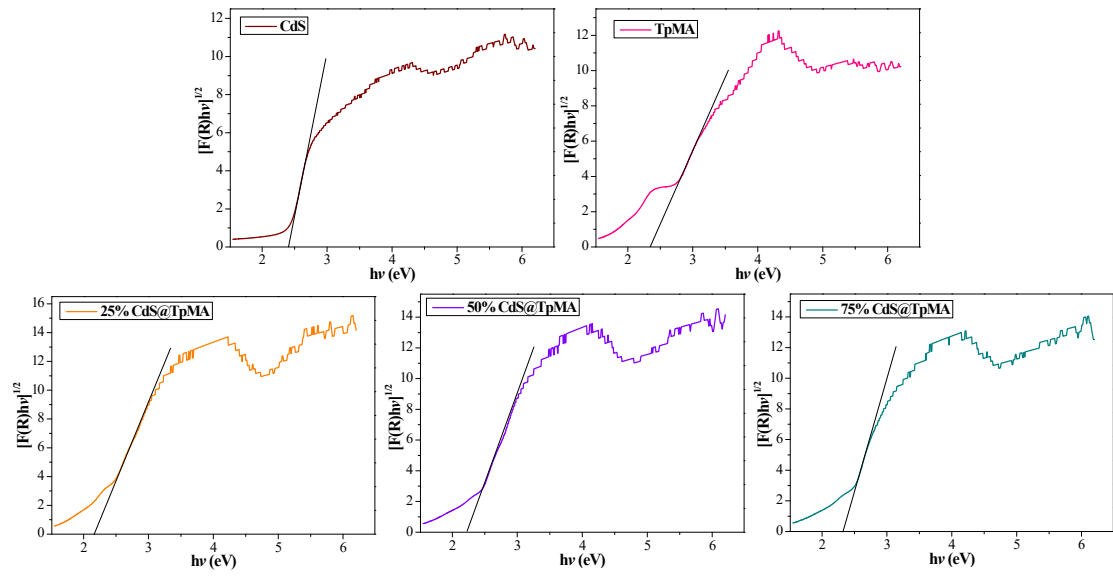

**Fig. S1.** The relationship of  $[F(R)hv]^{1/2}$  vs.  $h\nu$ .

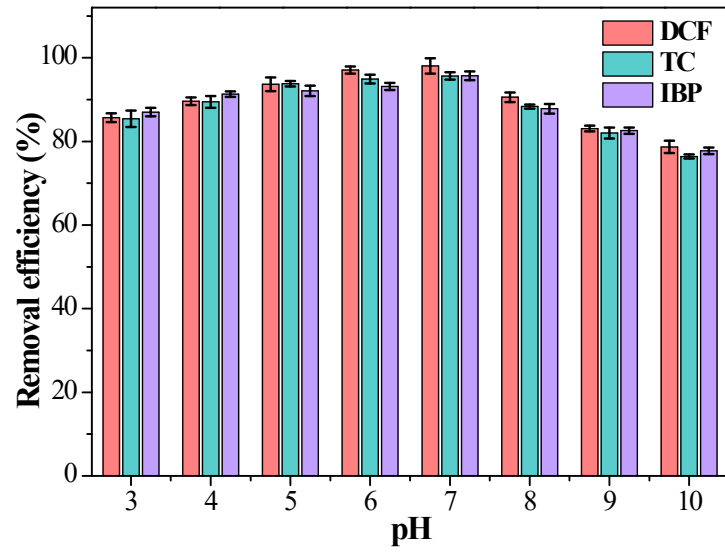

**Fig. S2.** Effects of pH on pollutant degradation over 25% CdS@TpMA.
